# Supplementary material for: Antiretroviral Resistance and Pregnancy Characteristics of Women with Perinatal and Nonperinatal HIV Infection
Source: Hindawi journal article supplement (doi:10.1155/2016/4897501), 2016-01-01
Supplement: f1 [file 4897501.f1.pdf]

Appendix 1. Combined antiretroviral therapy before, during, and after pregnancy in women with PHIV and NPHIV

| Subject number | HIV source | Delivery year | cART at conception     | ARV class(es) resistance | cART during pregnancy   | cART at delivery               | cART postpartum               |
|----------------|------------|---------------|------------------------|--------------------------|-------------------------|--------------------------------|-------------------------------|
| 1              | PHIV       | 2002          | AZT/3TC, NFV           | NNRTI                    | AZT/3TC, NFV            | <b>ddi, NVP, AZT/3TC, NFV</b>  | AZT/3TC, NFV                  |
| 2              | PHIV       | 2006          | TDF, 3TC, NPV, T-20    |                          | TDF, 3TC, NPV, T-20     | TDF, 3TC, NPV, T-20            | TDF, 3TC, NPV, T-20           |
| 3              | PHIV       | 2010          |                        | PI                       | FTC/TDF,DRV, RIT        | FTC/TDF,DRV, RIT               | FTC/TDF,DRV, RIT              |
| 4              | PHIV       | 2011          | FTC/TDF,DRV, RIT       |                          | FTC/TDF,DRV, RIT        | FTC/TDF,DRV, RIT               | FTC/TDF,DRV, RIT              |
| 5              | PHIV       | 2009          | EFV/FTC/TDF            | NRTI                     | <b>AZT/3TC, LPV/RIT</b> | <b>FTC/TDF, LPV/RIT</b>        | FTC/TDF, LPV/RIT              |
| 6              | PHIV       | 2010          |                        |                          | x                       |                                |                               |
| 7              | PHIV       | 2011          | FTC/TDF, ATV, RIT, RAL |                          | FTC/TDF, ATV, RIT, RAL  | FTC/TDF, ATV, RIT, RAL         | FTC/TDF, ATV, RIT, RAL        |
| 8              | PHIV       | 2009          | ABC/3TC, ATZ, RIT      |                          | ABC/3TC, ATZ, RIT       | ABC/3TC, ATZ, RIT              | ABC/3TC, ATZ, RIT             |
| 9              | PHIV       | 2008          |                        |                          | FTC/TDF, LPV/RIT        | FTC/TDF, LPV/RIT               | <b>FTC/TDF, ATV, RIT</b>      |
| 10             | PHIV       | 2006          | ABC/3TC/AZT            | PI                       | ABC/3TC/AZT             | ABC/3TC/AZT                    | ABC/3TC/AZT                   |
| 11             | PHIV       | 2008          |                        |                          | AZT/3TC, LPV/RIT        | AZT/3TC, LPV/RIT               | <b>AZT/3TC, ATV, RIT</b>      |
| 12             | PHIV       | 2009          | FTC/TDF, ATV, RIT      | NNRTI, PI                | FTC/TDF, ATV, RIT       | <b>FTC/TDF, DRV, RIT, T-20</b> | <b>FTC/TDF, DRV, RIT, RAL</b> |
| 13             | PHIV       | 2010          |                        |                          | AZT/3TC, LPV/RIT        | AZT/3TC, LPV/RIT               | <b>DISCONTINUED</b>           |
| 14             | PHIV       | 2008          |                        |                          | AZT/3TC, LPV/RIT        | AZT/3TC, LPV/RIT               | AZT/3TC, LPV/RIT              |
| 15             | PHIV       | 2005          |                        |                          | AZT/3TC, LPV/RIT        | AZT/3TC, LPV/RIT               | AZT/3TC, LPV/RIT              |
| 16             | PHIV       | 2008          | EFV/FTC/TDF            | PI                       | <b>FTC/TDF, LPV/RIT</b> | FTC/TDF, LPV/RIT               | FTC/TDF, LPV/RIT              |
| 17             | NPHIV      | 2010          | FTC/TDF, LPV/RIT       |                          | FTC/TDF, LPV/RIT        | FTC/TDF, LPV/RIT               | FTC/TDF, LPV/RIT              |
| 18             | NPHIV      | 2010          |                        | NNRTI                    | AZT/3TC, NPV, NFV       | <b>AZT/3TC, RAL</b>            | AZT/3TC, RAL                  |
| 19             | NPHIV      | 2011          |                        |                          | AZT/3TC, LPV/RIT        | AZT/3TC, LPV/RIT               | AZT/3TC, LPV/RIT              |
| 20             | NPHIV      | 2010          | AZT/3TC, NFV           |                          | AZT/3TC, NFV            | AZT/3TC, NFV                   | AZT/3TC, NFV                  |
| 21             | NPHIV      | 2007          |                        |                          | AZT/3TC, NFV            | AZT/3TC, NFV                   | AZT/3TC, NFV                  |
| 22             | PHIV       | 2012          |                        |                          | AZT/3TC, LPV/RIT        | AZT/3TC, LPV/RIT               | AZT/3TC, LPV/RIT              |
| 23             | NPHIV      | 2012          |                        |                          | FTC/TDF/RPV             | FTC/TDF/RPV                    | FTC/TDF/RPV                   |
| 24             | NPHIV      | 2004          |                        |                          | AZT/3TC, NVP            | AZT/3TC, NVP                   | AZT/3TC, NVP                  |
| 25             | NPHIV      | 2011          |                        | NNRTI                    | AZT/3TC, LPV/RIT        | AZT/3TC, LPV/RIT               | AZT/3TC, LPV/RIT              |
| 26             | NPHIV      | 2006          |                        |                          | AZT/3TC, NPV, NFV       | AZT/3TC, NPV, NFV              | AZT/3TC, NPV, NFV             |
| 27             | PHIV       | 2006          | 3TC, TDF, ATV, RIT     |                          | 3TC, TDF, ATV, RIT      | 3TC, TDF, ATV, RIT             | 3TC, TDF, ATV, RIT            |
| 28             | PHIV       | 2010          | ABC/ETC, NVP, DRV, RIT | NRTI,NNRTI               | ABC/ETC, NVP, DRV, RIT  | <b>ABC/3TC, EFV, DRV, RIT</b>  | ABC/3TC, EFV, DRV, RIT        |
| 29             | PHIV       | 2012          | ABC, TDF, LPV/RIT      | NNRTI                    | ABC, TDF, LPV/RIT       | ABC, TDF, LPV/RIT              | ABC, TDF, LPV/RIT             |
| 30             | NPHIV      | 2008          |                        |                          | AZT/3TC, LPV/RIT        | AZT/3TC, LPV/RIT               | <b>DISCONTINUED</b>           |
| 31             | NPHIV      | 2009          |                        |                          | AZT/3TC, LPV/RIT        | <b>AZT/3TC, TDF, LPV/RIT</b>   | <b>DISCONTINUED</b>           |
| 32             | NPHIV      | 2000          |                        |                          | AZT/3TC                 | AZT/3TC                        | AZT/3TC                       |
| 33             | NPHIV      | 2001          |                        |                          | x                       |                                |                               |
| 34             | NPHIV      | 2012          |                        |                          | AZT/3TC, LPV/RIT        | AZT/3TC, LPV/RIT               | AZT/3TC, LPV/RIT              |
| 35             | NPHIV      | 2008          |                        |                          | AZT/3TC, LPV/RIT        | AZT/3TC, LPV/RIT               | <b>DISCONTINUED</b>           |
| 36             | NPHIV      | 2011          |                        |                          | AZT/3TC, LPV/RIT        | AZT/3TC, LPV/RIT               |                               |
| 37             | NPHIV      | 2010          |                        |                          | AZT/3TC, LPV/RIT        | AZT/3TC, LPV/RIT               |                               |
| 38             | NPHIV      | 2004          |                        |                          | x                       |                                | <b>DISCONTINUED</b>           |
| 39             | NPHIV      | 2008          |                        |                          | x                       |                                |                               |
| 40             | NPHIV      | 2006          |                        |                          | AZT/3TC                 | <b>AZT/3TC, NFV</b>            | <b>DISCONTINUED</b>           |

|    |       |      |                             |                 |                                            |                                 |                               |
|----|-------|------|-----------------------------|-----------------|--------------------------------------------|---------------------------------|-------------------------------|
| 41 | NPHIV | 2005 |                             |                 | AZT/3TC, NFV                               | AZT/3TC, NFV                    | <b>DISCONTINUED</b>           |
| 42 | NPHIV | 2005 |                             |                 | AZT/3TC, NVP                               | AZT/3TC, NVP                    | AZT/3TC, NVP                  |
| 43 | NPHIV | 2006 |                             |                 | AZT/3TC, NVF                               | AZT/3TC, NVF                    | discontinued                  |
| 44 | PHIV  | 2011 | ABC/3TC, ETV, RAL           |                 | ABC/3TC, ETV, RAL                          | <b>TDF, ABC/3TC, DRV, RIT</b>   | TDF, ABC/3TC, DRV, RIT        |
| 45 | PHIV  | 2011 | FTC/TDF, ATV, RIT           |                 | FTC/TDF, ATV, RIT                          | FTC/TDF, ATV, RIT               | FTC/TDF, ATV, RIT             |
| 46 | PHIV  | 2010 |                             | NNRTI           | FTC/TDF, RAL                               | FTC/TDF, RAL                    | FTC/TDF, RAL                  |
| 47 | PHIV  | 2011 | FTC/TDF, ATV, RIT           |                 | FTC/TDF, ATV, RIT                          | FTC/TDF, ATV, RIT               | FTC/TDF, ATV, RIT             |
| 48 | PHIV  | 2005 | FTC/TDF, LPV/RIT            |                 | FTC/TDF, LPV/RIT                           | FTC/TDF, LPV/RIT                | FTC/TDF, LPV/RIT              |
| 49 | PHIV  | 2003 | D4T, ABC, NFV               |                 | D4T, ABC, NFV                              | D4T, ABC, NFV                   | D4T, ABC, NFV                 |
| 50 | PHIV  | 2011 |                             | NNRTI, PI       | AZT/3TC, LPV/RIT                           | AZT/3TC, LPV/RIT                | AZT/3TC, LPV/RIT              |
| 51 | NPHIV | 2008 | FTC/TDF, ATV, RIT           |                 | FTC/TDF, ATV, RIT                          | <b>AZT/3TC, NFV</b>             | <b>AZT/3TC, LPV/RIT</b>       |
| 52 | NPHIV | 2006 |                             |                 | AZT/3TC, LPV/RIT                           | AZT/3TC, LPV/RIT                | discontinued                  |
| 53 | NPHIV | 2006 |                             |                 | AZT/3TC, NFV                               | AZT/3TC, NFV                    | AZT/3TC, NFV                  |
| 54 | NPHIV | 2008 |                             |                 | AZT/3TC, LPV/RIT                           | AZT/3TC, LPV/RIT                | AZT/3TC, LPV/RIT              |
| 55 | NPHIV | 2010 |                             |                 | AZT/3TC, LPV/RIT                           | AZT/3TC, LPV/RIT                | <b>ABC/3TC, ATV, RIT</b>      |
| 56 | NPHIV | 2007 | FTC/TDF, ATV, RIT           | NRTI            | <b>AZT/3TC, NFV</b>                        | AZT/3TC, NFV                    | <b>FTC/TDF, ATV, RIT</b>      |
| 57 | PHIV  | 2010 | EFV/FTC/TDF                 |                 | <b>AZT/3TC, LPV/RIT</b>                    | AZT/3TC, LPV/RIT                | AZT/3TC, LPV/RIT              |
| 58 | PHIV  | 2013 |                             | NRTI, NNRTI     | ETV, DRV, RIT, RAL                         | ETV, DRV, RIT, RAL              | ETV, DRV, RIT, RAL            |
| 59 | PHIV  | 2013 | EFV/FTC/TDF                 |                 | EFV/FTC/TDF                                | <b>RPV/TDF/FTC</b>              | RPV/TDF/FTC                   |
| 60 | PHIV  | 2013 | FTC/TDF, DRV, RIT, RAL, MVC | NRTI, NNRTI, PI | <b>FTC/ETC/EVG/COB, MVC, ETV, DRV, RIT</b> | <b>TPV, RIT, DTG, T-20, MVC</b> | TPV, RIT, DTG, T-20, MVC      |
| 61 | NPHIV | 2013 | EFV/FTC/TDF, ATZ, RIT       |                 | <b>FTC/TDF, ATV, RIT</b>                   | FTC/TDF, ATV, RIT               | FTC/TDF, ATV, RIT             |
| 62 | NPHIV | 2013 | FTC/TDF, DRV, RIT           |                 | FTC/TDF, DRV, RIT                          | FTC/TDF, DRV, RIT               | FTC/TDF, DRV, RIT             |
| 63 | PHIV  | 2013 | FTC/TDF, DRV, RIT           |                 | FTC/TDF, DRV, RIT                          | FTC/TDF, DRV, RIT               | FTC/TDF, DRV, RIT             |
| 64 | NPHIV | 2014 | FTC/ETC/EVG/COB             |                 | FTC/ETC/EVG/COB                            | FTC/ETC/EVG/COB                 | FTC/ETC/EVG/COB               |
| 65 | PHIV  | 2013 | FTC/TDF, DRV, RIT           |                 | FTC/TDF, DRV, RIT                          | FTC/TDF, DRV, RIT               | FTC/TDF, DRV, RIT             |
| 66 | PHIV  | 2013 |                             |                 | ABC/3TC, TDF, RPV                          | ABC/3TC, TDF, RPV               | ABC/3TC, TDF, RPV             |
| 67 | NPHIV | 2012 |                             |                 | FTC/TDF, ATV, RIT                          | FTC/TDF, ATV, RIT               | FTC/TDF, ATV, RIT             |
| 68 | NPHIV | 2012 | EFV/FTC/TDF                 |                 | <b>FTC/TDF, ATV, RIT</b>                   | FTC/TDF, ATV, RIT               | <b>FTC/TDF, RPV</b>           |
| 69 | NPHIV | 2012 |                             |                 | AZT/3TC, LPV/RIT                           | AZT/3TC, LPV/RIT                | AZT/3TC, LPV/RIT              |
| 70 | NPHIV | 2012 |                             |                 | AZT/3TC, LPV/RIT                           | <b>ABC/3TC, ATZ, RIT</b>        | <b>DISCONTINUED</b>           |
| 71 | NPHIV | 2010 |                             |                 | ABC/3TC, ATZ, RIT                          | ABC/3TC, ATZ, RIT               | <b>DISCONTINUED</b>           |
| 72 | NPHIV | 2010 | ABC/3TC, ATZ, RIT           |                 | ABC/3TC, ATZ, RIT                          | ABC/3TC, ATZ, RIT               | ABC/3TC, ATZ, RIT             |
| 73 | NPHIV | 2010 |                             |                 | FTC/TDF, DRV, RIT                          | FTC/TDF, DRV, RIT               | <b>DISCONTINUED</b>           |
| 74 | PHIV  | 2011 | AZT/3TC, LPV/RIT            |                 | AZT/3TC, LPV/RIT                           | AZT/3TC, LPV/RIT                | <b>DISCONTINUED</b>           |
| 75 | NPHIV | 2011 | ABC/3TC, ATZ, RIT           |                 | ABC/3TC, ATZ, RIT                          | ABC/3TC, ATZ, RIT               | ABC/3TC, ATZ, RIT             |
| 76 | NPHIV | 2010 |                             |                 | AZT/3TC, ETV                               | <b>FTC/TDF, ETV</b>             | <b>ABC/3TC, ETV</b>           |
| 77 | PHIV  | 2014 |                             | NRTI, NNRTI     | FTC/ETC/EVG/COB                            | FTC/ETC/EVG/COB                 | FTC/ETC/EVG/COB               |
| 78 | PHIV  | 2014 | FTC/TDF, ATV, RIT           | NRTI, NNRTI     | <b>ETV, DRV, RIT, RAL</b>                  | ETV, DRV, RIT, RAL              | ETV, DRV, RIT, RAL            |
| 79 | PHIV  | 2014 | FTC/TDF, DRV, RIT           | NNRTI           | <b>FTC/TDF, ABC/3TC, DRV, RIT</b>          | <b>FTC/TDF, DRV, RIT</b>        | <b>TDF, ABC/3TC, DRV, RIT</b> |
| 80 | PHIV  | 2014 |                             |                 | FTC/TDF/RPV                                | FTC/TDF/RPV                     | FTC/TDF/RPV                   |
| 81 | PHIV  | 2014 | FTC/TDF/RPV                 |                 | FTC/TDF/RPV                                | <b>FTC/ETC/EVG/COB</b>          | FTC/ETC/EVG/COB               |
| 82 | PHIV  | 2014 | FTC/TDF, ATV, RIT           |                 | FTC/TDF, ATV, RIT                          | FTC/TDF, ATV, RIT               | FTC/TDF, ATV, RIT             |

Changes in combined antiretroviral therapy (cART) are bolded. 3TC = lamivudine; ABC = abacavir; ATV= atazanavir; COB=cobicistat; d4T= stavudine; DDI= didanosine; DRV = darunavir; DTG = dolutegravir; EFV = efavirenz; ETV= etravirine; EVG= elvitegravir; FTC= emtricitabine; LPV= lopinavir; MVC= maraviroc; NFV= nelfinavir; NVP= nevirapine; TDF=tenofovir; TPV= tipranavir; RAL = raltegravir; RIT=ritonavir, RPV = rilpivirine; T-20= enfuvirtide
